# Supplementary material for: Microbial communities associated with the black morel Morchella sextelata cultivated in greenhouses
Source: PeerJ journal article supplement (doi:10.7717/peerj.7744), 2019-09-26

# Taxonomy Assignments Comparison

Number of classified OTUs

1000  
500  
0

Classifier

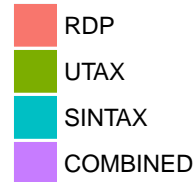

Kingdom\_RDP -  
Kingdom\_SINTAX -  
Kingdom\_UTAX -  
Kingdom\_Consensus -  
Phylum\_RDP -  
Phylum\_SINTAX -  
Phylum\_UTAX -  
Phylum\_Consensus -  
Class\_RDP -  
Class\_SINTAX -  
Class\_UTAX -  
Class\_Consensus -  
Order\_RDP -  
Order\_SINTAX -  
Order\_UTAX -  
Order\_Consensus -  
Family\_RDP -  
Family\_SINTAX -  
Family\_UTAX -  
Family\_Consensus -  
Genus\_RDP -  
Genus\_SINTAX -  
Genus\_UTAX -  
Genus\_Consensus -  
Species\_RDP -  
Species\_SINTAX -  
Species\_UTAX -  
Species\_Consensus -

Taxonomic Ranks

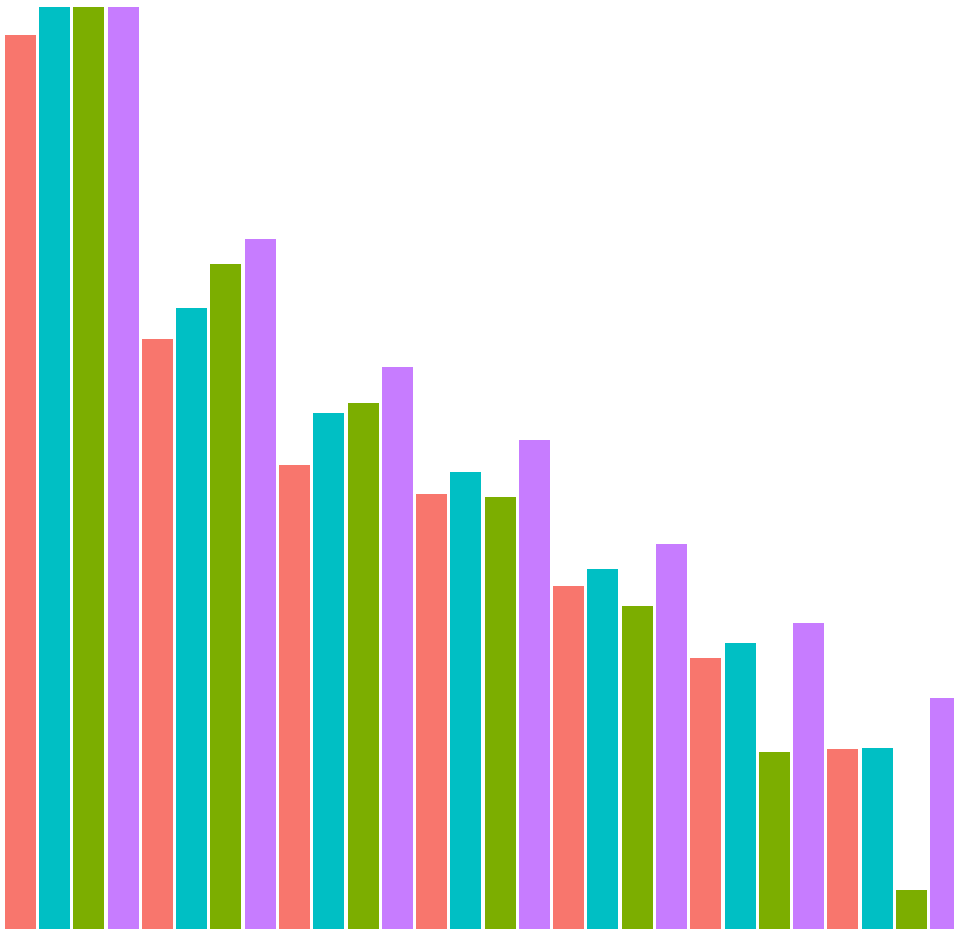

Supplement: Fig_S1_TaxonomicAssignmentComparison.pdf [file Fig_S1_TaxonomicAssignmentComparison.pdf]
