# Supplementary material for: Microbial communities associated with the black morel Morchella sextelata cultivated in greenhouses
Source: PeerJ journal article supplement (doi:10.7717/peerj.7744), 2019-09-26

## (A) Prokaryotes

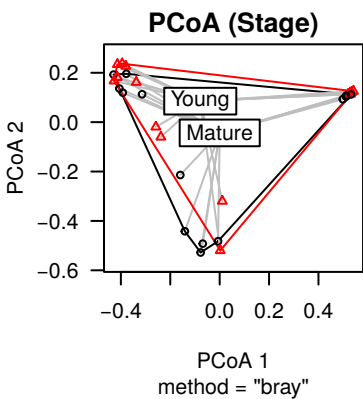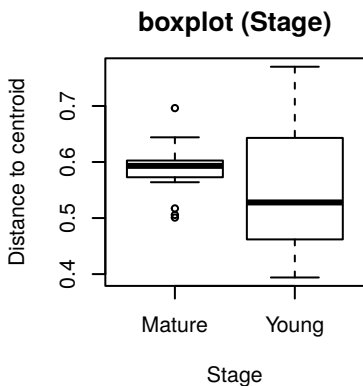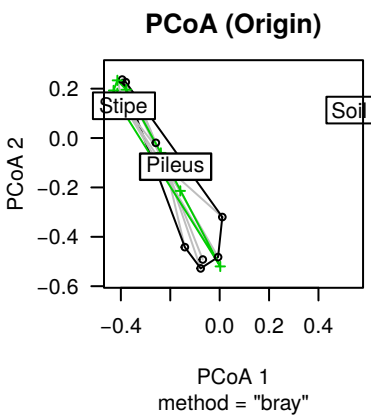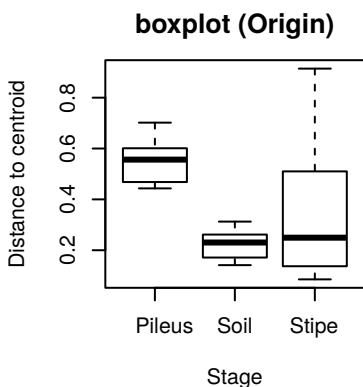

## (B) Fungi

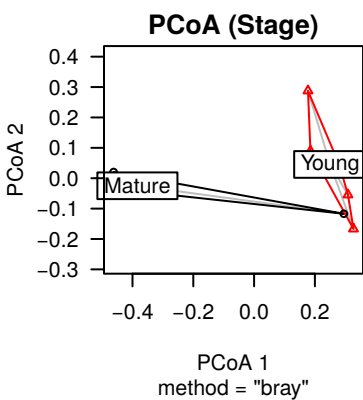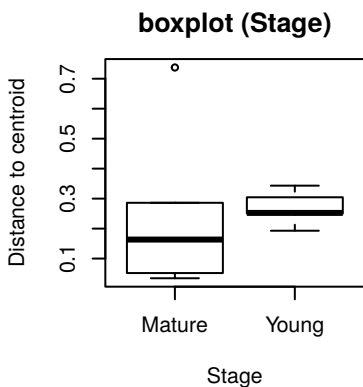

Supplement: Fig_S4_betadisper_rev.pdf [file Fig_S4_betadisper_rev.pdf]
